# Supplementary material for: Factors associated with the prevalence of HIV, HSV-2, pregnancy, and reported sexual activity among adolescent girls in rural western Kenya: A cross-sectional analysis of baseline data in a cluster randomized controlled trial
Source: PubMed Central journal article supplement (PMC8478198; doi:10.1371/journal.pmed.1003756), 2021-09-28
Supplement: pmed.1003756.s001.pdf [file pmed.1003756.s001.pdf]

**Data Dictionary – Baseline Cups or Cash for Girls Trial sociodemographic and quality of life survey**

| Variable Name | Question Text                                             | Saved Value                          |                                                                                                 |
|---------------|-----------------------------------------------------------|--------------------------------------|-------------------------------------------------------------------------------------------------|
| bqdate        | Date of Interview                                         | User selected date                   |                                                                                                 |
| bqa1          | What is your main source of water at home?                | 1<br>2<br>3<br>4<br>5<br>6<br>7<br>8 | Pond<br>Borehole<br>Lake<br>Pipe in house<br>Rainwater<br>River<br>Stream<br>Other              |
| bqa1_oth      | Specify:                                                  | User entered text                    |                                                                                                 |
| bqa2          | What type of latrine do you use at home?                  | 1<br>2<br>3<br>4<br>5                | Flush toilet<br>Bush/field<br>Traditional pit<br>Ventilated improved pit (VIP) latrine<br>Other |
| bqa2_oth      | Specify:                                                  | User entered text                    |                                                                                                 |
| bqa3          | What is used for light in your house?                     | 1<br>2<br>3<br>4<br>5                | Electricity<br>Kerosene<br>lamp<br>Tin lamp<br>Candles<br>Other                                 |
| bqa3_oth      | Specify:                                                  | User entered text                    |                                                                                                 |
| bqa4          | What type of flooring material do you have at your house? | 1<br>2<br>3<br>4<br>5                | Earth/sand<br>Cement<br>Dung<br>Ceramic tiles<br>Other                                          |
| bqa4_oth      | Specify:                                                  | User entered text                    |                                                                                                 |
| bqa5          | What type of roofing material do you have at your house?  | 1<br>2<br>3<br>4                     | Straw<br>Tin/Iron<br>Sheets<br>Tiles<br>Other                                                   |
| bqa5_oth      | Specify:                                                  | User entered text                    |                                                                                                 |
| bqa6          | Where does your family cook at home?                      | 1<br>2<br>3<br>4                     | Inside the house<br>In a separate building<br>Outdoors<br>Other                                 |
| bqa6_oth      | Specify:                                                  | User entered text                    |                                                                                                 |

**Data Dictionary – Baseline Cups or Cash for Girls Trial sociodemographic and quality of life survey**

| Variable Name | Question Text                                                                                                            | Saved Value             |                                                                           |
|---------------|--------------------------------------------------------------------------------------------------------------------------|-------------------------|---------------------------------------------------------------------------|
| bqa7          | What type of cooking fuel does your family use†                                                                          | 1<br>2<br>3<br>4<br>5   | Wood<br>Charco<br>al<br>Gas cylinders<br>Electricity<br>Other             |
| bqa7_oth      | Specify:                                                                                                                 | User entered text       |                                                                           |
| bqa8          | Do you or a family member in your household have a mobile phone†                                                         | 1                       | No<br>Yes                                                                 |
| bqa9          | Is there a TV in your household?                                                                                         | 0<br>1                  | No<br>Yes                                                                 |
| bqa10         | Is there a radio in your household?                                                                                      | 0<br>1                  | No<br>Yes                                                                 |
| bqa13         | What is your father's occupation, that is what kind of work does he mainly do?                                           | 1<br>2<br>0<br>98<br>99 | Farmer/Shamba<br>Other<br>Does not work<br>Father not alive<br>Don't know |
| bqa15         | What is your mother's occupation, that is what kind of work does she mainly do?                                          | 1<br>2<br>0<br>98<br>99 | Farmer/Shamba<br>Other<br>Does not work<br>Mother not alive<br>Don't know |
| bqa15_oth     | Specify:                                                                                                                 | User entered text       |                                                                           |
| bqa16         | Is your mother paid in cash or in kind for this work or i. she not paid at all                                           | 1<br>2<br>3<br>4<br>99  | Cash<br>In kind<br>Cash and in kind<br>Not paid<br>Don't know             |
| bq1           | What is your marital status? Cohabiting means that you are living with your partner with no formal marriage certificate. | 2<br>3<br>4<br>5        | Single<br>Married<br>Cohabiting<br>Widowed<br>Other                       |

**Data Dictionary – Baseline Cups or Cash for Girls Trial sociodemographic and quality of life survey**

| Variable Name | Question Text                                                                                      | Saved Value                |                                                                                                                     |
|---------------|----------------------------------------------------------------------------------------------------|----------------------------|---------------------------------------------------------------------------------------------------------------------|
| bq5           | Do you have a baby or child you take care of?                                                      | 0<br>1                     | No<br>Yes                                                                                                           |
| bq6           | Who is the birth mother of this child?                                                             | 1<br>2<br>3<br>4<br>5<br>6 | Me<br>My partner other wife<br>My mother<br>A relative in the household<br>A relative not in the household<br>Other |
| bq7           | Are you normally happy at home?                                                                    | 0<br>1<br>2                | Not happy<br>Just OK<br>Happy                                                                                       |
| bq8           | Are you normally happy at school?                                                                  | 0<br>1<br>2                | Not happy<br>Just OK<br>Happy                                                                                       |
| bq9           | During the last month that your classmates were attending school, did you miss any time at school? | 0<br>1                     | No<br>Yes                                                                                                           |
| bq10          | If yes, how many days of school did you miss in the                                                | User entered integer       |                                                                                                                     |
| bq12          | Do you have good friends at school?                                                                | 0<br>1<br>2                | No<br>They are just ok<br>Yes                                                                                       |
| bq13          | How much do you like being at school?                                                              | 0<br>1<br>2                | Do not like it<br>It is just ok<br>Like it                                                                          |
| bq14          | Do girls in your school drink alcohol?                                                             | 0<br>1<br>2<br>99          | None<br>Some of them<br>Many<br>Don't know                                                                          |
| bq15          | Do girls in your school smoke cigarettes?                                                          | 0<br>1<br>2<br>99          | None<br>Some of them<br>Many<br>Don't know                                                                          |
| bq16          | If there are any boys in your school, do they drink alcohol?                                       | 0<br>1<br>2<br>98<br>99    | None<br>Some of them<br>Many<br>No boys; girls school only<br>Don't know                                            |

**Data Dictionary – Baseline Cups or Cash for Girls Trial sociodemographic and quality of life survey**

| Variable Name | Question Text                                                        | Saved Value             |                                                                          |
|---------------|----------------------------------------------------------------------|-------------------------|--------------------------------------------------------------------------|
| bq17          | Do boys in your school smoke cigarettes†                             | 0<br>1<br>2<br>98<br>99 | None<br>Some of them<br>Many<br>No boys; girls school only<br>Don't know |
| bq18          | Do you drink alcohol?                                                | 0<br>1<br>2             | Never<br>Sometimes<br>Regularly                                          |
| bq19          | Do you smoke cigarettes?                                             | 0<br>1<br>2             | Never<br>Sometimes<br>Regularly                                          |
| bq23          | In the past 6 months: Have you been touched indecently by a boy/man? | 0<br>1<br>2<br>3        | Never<br>Just once<br>A few times<br>Many times                          |
| bq32          | When inside the school, do boys or men harass girls for sex?         | 1<br>2                  | Never<br>A few times<br>Many times                                       |
| bq34          | When outside the school, do boys or men harass girls for sex?        | 0<br>1<br>2             | Never<br>A few times<br>Many times                                       |
| bq36          | Have you ever had sex with a man or boy?                             | 0<br>1<br>2<br>3        | Never<br>Just once<br>A few times<br>Many times                          |
| bq37          | Has a man or boy ever forced or threatened to make you have sex?     | 0<br>1<br>2<br>3        | Never<br>Just once<br>A few times<br>Many times                          |

## Data Dictionary – Baseline Cups or Cash for Girls Trial sociodemographic and quality of life survey

| Variable Name | Question Text                                                                                                                                    | Saved Value                 |                                                                                                                                                                    |
|---------------|--------------------------------------------------------------------------------------------------------------------------------------------------|-----------------------------|--------------------------------------------------------------------------------------------------------------------------------------------------------------------|
| bq39          | Do you remember how old you were when you first had sex or were forced or threatened into having sex?                                            | 0<br>1                      | No<br>Yes                                                                                                                                                          |
| bq40          | What age were you when you first had sex or were forced or threatened into having sex?                                                           | User entered integer        |                                                                                                                                                                    |
| bq41          | Do you remember in which year or month you first had sex or were forced or threatened into having sex?                                           | 0<br>1                      | No<br>Yes                                                                                                                                                          |
| bq42_y        | Enter 4 digit year                                                                                                                               | User entered integer        |                                                                                                                                                                    |
| bq42_m        | Enter month number                                                                                                                               | User entered integer        |                                                                                                                                                                    |
| bq43          | The first time you had sex (or were forced or threatened to make you have sex with) a boy or man, how old was the man or boy? Was he...          | 1<br>2<br>3<br>4<br>5<br>99 | Younger than you<br>About the same age<br>Older than you by less than 5 years<br>Older than you by 5 - 9 years<br>Older than you by 10 years or more<br>Don't know |
| bq44          | The first time you had sex (or were forced or threatened to make you have sex with) a boy or man, who was the man or boy? Was he...              | 0<br>1                      | Someone you had never seen before<br>Someone you knew                                                                                                              |
| bq45          | If you did know him, was he...                                                                                                                   | 2<br>3<br>4<br>5            | Boyfriend but not living with him<br>Husband but not living with him<br>Partner/husband after living together<br>Relative<br>Other person                          |
| bq46          | The first time you had sex (or were forced or threatened to make you have sex with) a boy or man, did you want to have sex with this man or boy? | 0<br>1                      | No<br>Yes                                                                                                                                                          |
| bq47          | The first time you had sex (or were forced or threatened to make you have sex with) a boy or man, was he circumcised or uncircumcised?           | 1<br>2<br>3                 | Circumcised<br>Uncircumcised<br>Don't know                                                                                                                         |
| bq48          | How many boys or men have you had sex with (or been forced or threatened to make you have sex with) in your life? It's ok if you can't remember? | User entered integer        |                                                                                                                                                                    |
| bq50          | Have you or your partner ever used condoms to delay or avoid a pregnancy or sexually transmitted infection?                                      | 0<br>1                      | No<br>Yes                                                                                                                                                          |

**Data Dictionary – Baseline Cups or Cash for Girls Trial sociodemographic and quality of life survey**

| Variable Name | Question Text                                                   | Saved Value              |                  |
|---------------|-----------------------------------------------------------------|--------------------------|------------------|
| bq61          | Does the boy or man give you something for having sex with him? | 0<br>1                   | No<br>Yes        |
| bq62_q        | If yes, what?                                                   | For display purpose only |                  |
| bq62_1        | Money                                                           | 0<br>1                   | No<br>Yes        |
| bq62_2        | Food/drink                                                      | 0<br>1                   | No<br>Yes        |
| bq62_3        | House items                                                     | 0<br>1                   | No<br>Yes        |
| bq62_4        | School items                                                    | 0<br>1                   | No<br>Yes        |
| bq62_5        | Help with exams                                                 | 0<br>1                   | No<br>Yes        |
| bq62_6        | Pads for monthly period                                         | 0<br>1                   | No<br>Yes        |
| bq62_7        | Less beatings/bad things                                        | 0<br>1                   | No<br>Yes        |
| bq62_8        | Clothes/things                                                  | 0<br>1                   | No<br>Yes        |
| bq62_9        | Other                                                           | 0<br>1                   | No<br>Yes        |
| bq63          | Are you currently using any family planning methods?            | 1<br>0                   | Yes<br>No method |

**Data Dictionary – Baseline Cups or Cash for Girls Trial sociodemographic and quality of life survey**

| Variable Name | Question Text                                                                       | Saved Value              |                          |
|---------------|-------------------------------------------------------------------------------------|--------------------------|--------------------------|
| bq63_1_q      | If yes, which family planning method are you using?                                 | For display purpose only |                          |
| bq63_1_0      | No method                                                                           | 0                        | No                       |
|               |                                                                                     | 1                        | Yes                      |
| bq63_1_1      | Birth control pills                                                                 | 0                        | No                       |
|               |                                                                                     | 1                        | Yes                      |
| bq63_1_2      | Injection                                                                           | 0                        | No                       |
|               |                                                                                     | 1                        | Yes                      |
| bq63_1_3      | Implant                                                                             | 0                        | No                       |
|               |                                                                                     | 1                        | Yes                      |
| bq63_1_4      | Abstinence                                                                          | 0                        | No                       |
|               |                                                                                     | 1                        | Yes                      |
| bq63_1_5      | Other                                                                               | 0                        | No                       |
|               |                                                                                     | 1                        | Yes                      |
| bq63_1_oth    | You chose other, please specify which type of family planning method you are using? | User entered text        |                          |
| bq64          | Are you currently pregnant?                                                         | 0                        | No                       |
|               |                                                                                     | 1                        | Yes                      |
| bq65          | Are you currently trying to get pregnant?                                           | 0                        | No                       |
|               |                                                                                     | 1                        | Yes                      |
| bq66          | Have you ever been pregnant?                                                        | 0                        | No                       |
|               |                                                                                     | 1                        | Yes                      |
| bq67          | How many times have you been pregnant?                                              | User entered integer     |                          |
| bq68          | How many babies have you given birth to?                                            | User entered integer     |                          |
| bq69          | What happened with the most recent pregnancy?                                       | 1                        | Had a miscarriage        |
|               |                                                                                     | 2                        | Aborted/terminated       |
|               |                                                                                     | 3                        | Baby born but died       |
|               |                                                                                     | 4                        | Baby born alive          |
|               |                                                                                     | 5                        | Currently still pregnant |
|               |                                                                                     | 6                        | Other                    |
| bq70          | If "baby born alive," who does this baby live with?                                 | 1                        | Me                       |
|               |                                                                                     | 2                        | Not me                   |

## Data Dictionary – Baseline Cups or Cash for Girls Trial sociodemographic and quality of life survey

| Variable Name      | Question Text                                                         | Saved Value              |                      |
|--------------------|-----------------------------------------------------------------------|--------------------------|----------------------|
| bq71               | If "not me" then who?                                                 | 1                        | My parents           |
|                    |                                                                       | 2                        | My sister or brother |
|                    |                                                                       | 3                        | Other family         |
|                    |                                                                       | 4                        | The child's father   |
|                    |                                                                       | 5                        | The father's family  |
|                    |                                                                       | 6                        | Other                |
| bq73               | In the past 6 weeks did you have a period†                            | 0                        | No                   |
|                    |                                                                       | 1                        | Yes                  |
| bq74               | Have you ever used sanitary pads?                                     | 0                        | No                   |
|                    |                                                                       | 1                        | Yes                  |
| your_recent_period | All the next questions are for your recent period in school term-time | For display purpose only |                      |
| bq77               | Did you use any sanitary pads to help manage your period?             |                          | Yes; entire period   |
|                    |                                                                       | 2                        | Yes; part of period  |
|                    |                                                                       | 0                        | No                   |
| bq83               | How many days did you bleed during your most recent period?           | User entered integer     |                      |
| bq84               | Was it heavy, normal or light†                                        | 1                        | Heavy                |
|                    |                                                                       | 2                        | Normal               |
|                    |                                                                       | 3                        | Light                |
| bq85               | Did your period stop you from doing things?                           | 0                        | No                   |
|                    |                                                                       | 1                        | Yes                  |
| bq86_q             | If yes, what did you stop doing?                                      | For display purpose only |                      |
| bq86_1             | Attending school                                                      | 0                        | No                   |
|                    |                                                                       | 1                        | Yes                  |
| bq86_2             | Sports at school                                                      | 0                        | No                   |
|                    |                                                                       | 1                        | Yes                  |
| bq86_3             | Work at school                                                        | 0                        | No                   |
|                    |                                                                       | 1                        | Yes                  |
| bq86_4             | School homework assignments                                           | 0                        | No                   |
|                    |                                                                       | 1                        | Yes                  |
| bq86_5             | Other work outside of school                                          | 0                        | No                   |
|                    |                                                                       | 1                        | Yes                  |
| bq86_6             | Other                                                                 | 0                        | No                   |
|                    |                                                                       | 1                        | Yes                  |



**Data Dictionary – Baseline Cups or Cash for Girls Trial sociodemographic and quality of life survey**

| Variable Name | Question Text                                                                         | Saved Value              |           |
|---------------|---------------------------------------------------------------------------------------|--------------------------|-----------|
| bq92          | Did you miss school (during recent period in term time)?                              | 0<br>1                   | No<br>Yes |
| bq93          | If yes, did you miss because of something to do with your period?                     | 0<br>1                   | No<br>Yes |
| bq96          | During recent period, did you have to do things to get pads or other menstrual items? | 0<br>1                   | No<br>Yes |
| bq97_q        | If yes, what?                                                                         | For display purpose only |           |
| bq97_1        | Laundry                                                                               | 0<br>1                   | No<br>Yes |
| bq97_2        | Childcare                                                                             | 0<br>1                   | No<br>Yes |
| bq97_3        | Housework                                                                             | 0<br>1                   | No<br>Yes |
| bq97_4        | Shamba                                                                                | 0<br>1                   | No<br>Yes |
| bq97_5        | Bar work                                                                              | 0<br>1                   | No<br>Yes |
| bq97_6        | Sex                                                                                   | 0<br>1                   | No<br>Yes |
| bq97_7        | Other                                                                                 | 0<br>1                   | No<br>Yes |
| bq98          | Apart from schoolwork, do you have other tasks or work you must do?                   | 0<br>1                   | No<br>Yes |
| bq99_q        | Tick any of the below that you did last month:                                        | For display purpose only |           |
| bq99_1        | Household chores                                                                      | 0<br>1                   | No<br>Yes |
| bq99_2        | Look after siblings                                                                   | 0<br>1                   | No<br>Yes |
| bq99_3        | Look after other family                                                               | 0<br>1                   | No<br>Yes |
| bq99_4        | Laundry/mend clothes                                                                  | 0<br>1                   | No<br>Yes |
| bq99_5        | Work in the shamba                                                                    | 0<br>1                   | No<br>Yes |
| bq99_6        | Fetch water                                                                           | 0<br>1                   | No<br>Yes |

## Data Dictionary – Baseline Cups or Cash for Girls Trial sociodemographic and quality of life survey

| Variable Name | Question Text                                                                                                                                                                                                                                                                              | Saved Value              |           |
|---------------|--------------------------------------------------------------------------------------------------------------------------------------------------------------------------------------------------------------------------------------------------------------------------------------------|--------------------------|-----------|
| bq99_7        | Help in shop or business                                                                                                                                                                                                                                                                   | 0<br>1                   | No<br>Yes |
| bq99_8        | Work in bar                                                                                                                                                                                                                                                                                | 0<br>1                   | No<br>Yes |
| bq99_9        | Sex work                                                                                                                                                                                                                                                                                   | 0<br>1                   | No<br>Yes |
| bq99_10       | Other things                                                                                                                                                                                                                                                                               | 0<br>1                   | No<br>Yes |
| bq100         | Yesterday, how many hours did you spend doing household chores, such as cooking, cleaning, laundry, collecting firewood, water?                                                                                                                                                            | User entered decimal     |           |
| bq101         | Aside from schoolwork and housework, have you done any work in the last seven days?                                                                                                                                                                                                        | 0<br>1                   | No<br>Yes |
| bq102         | If yes, what?                                                                                                                                                                                                                                                                              | User entered text        |           |
| bq103         | As you know, some girls take up jobs for which they are given pocket money or gifts. Others sell things, have a small business or work on the family farm or in the family business. Have you ever done any chores or activities for which you got paid or were given something in return? | 1                        | No<br>Yes |
| bq104         | How old were you the very first time you did any work or activity for pay or favours?                                                                                                                                                                                                      | User entered integer     |           |
| bq105         | In the last school term, have you done any chores or activities for which you got paid or were given something in return?                                                                                                                                                                  |                          | No<br>Yes |
| bq106_q       | If yes, what were you given in return?                                                                                                                                                                                                                                                     | For display purpose only |           |
| bq106_1       | Personal clothes/things                                                                                                                                                                                                                                                                    | 0<br>1                   | No<br>Yes |
| bq106_2       | School clothes                                                                                                                                                                                                                                                                             | 0<br>1                   | No<br>Yes |
| bq106_3       | Food/drink                                                                                                                                                                                                                                                                                 | 0<br>1                   | No<br>Yes |
| bq106_4       | Money                                                                                                                                                                                                                                                                                      | 0<br>1                   | No<br>Yes |
| bq106_5       | Soap                                                                                                                                                                                                                                                                                       | 0<br>1                   | No<br>Yes |
| bq106_6       | Book                                                                                                                                                                                                                                                                                       | 0<br>1                   | No<br>Yes |
| bq106_7       | Phone                                                                                                                                                                                                                                                                                      | 0<br>1                   | No<br>Yes |
| bq106_8       | Pads for monthly period                                                                                                                                                                                                                                                                    | 0<br>1                   | No<br>Yes |
| bq106_9       | Allowed to pass exams                                                                                                                                                                                                                                                                      | 0<br>1                   | No<br>Yes |

**Data Dictionary – Baseline Cups or Cash for Girls Trial sociodemographic and quality of life survey**

| Variable Name | Question Text                                                                       | Saved Value              |                                                                                                                             |
|---------------|-------------------------------------------------------------------------------------|--------------------------|-----------------------------------------------------------------------------------------------------------------------------|
| bq106_10      | House things                                                                        | 0<br>1                   | No<br>Yes                                                                                                                   |
| bq106_11      | Favours                                                                             | 0<br>1                   | No<br>Yes                                                                                                                   |
| bq106_12      | Less beatings                                                                       | 0<br>1                   | No<br>Yes                                                                                                                   |
| bq106_13      | Other                                                                               | 0<br>1                   | No<br>Yes                                                                                                                   |
| bq107         | If you do work, did you take time off school for this during the last school month? | 0<br><br>2<br><br>3      | No, not last month<br>Yes, just a few times last month<br>Yes, many times last month<br>Yes, almost all the time last month |
| bq108         | Have you ever had sex in order to pay for things, or get favours?                   | 0<br>1                   | No<br>Yes                                                                                                                   |
| bq109_q       | If yes, what have you been given in return?                                         | For display purpose only |                                                                                                                             |
| bq109_1       | Personal clothes/things                                                             | 0<br>1                   | No<br>Yes                                                                                                                   |
| bq109_2       | School clothes                                                                      | 0<br>1                   | No<br>Yes                                                                                                                   |
| bq109_3       | Food/drink                                                                          | 0<br>1                   | No<br>Yes                                                                                                                   |
| bq109_4       | Money                                                                               | 0<br>1                   | No<br>Yes                                                                                                                   |
| bq109_5       | Soap                                                                                | 0<br>1                   | No<br>Yes                                                                                                                   |
| bq109_6       | Book                                                                                | 0<br>1                   | No<br>Yes                                                                                                                   |
| bq109_7       | Phone                                                                               | 0<br>1                   | No<br>Yes                                                                                                                   |
| bq109_8       | Pads for monthly period                                                             | 0<br>1                   | No<br>Yes                                                                                                                   |
| bq109_9       | Allowed to pass exams                                                               | 0<br>1                   | No<br>Yes                                                                                                                   |
| bq109_10      | House things                                                                        | 0<br>1                   | No<br>Yes                                                                                                                   |

**Data Dictionary – Baseline Cups or Cash for Girls Trial sociodemographic and quality of life survey**

| Variable Name | Question Text                                                           | Saved Value              |                                                               |
|---------------|-------------------------------------------------------------------------|--------------------------|---------------------------------------------------------------|
| bq109_11      | Favours                                                                 | 0<br>1                   | No<br>Yes                                                     |
| bq109_12      | Less beatings                                                           | 0<br>1                   | No<br>Yes                                                     |
| bq109_13      | Other                                                                   | 0<br>1                   | No<br>Yes                                                     |
| bq116         | Do you currently have any money saved?                                  | 0<br>1                   | No<br>Yes                                                     |
| bq118_q       | Where do you usually get money†                                         | For display purpose only |                                                               |
| bq118_1       | Parents                                                                 | 0<br>1                   | No<br>Yes                                                     |
| bq118_2       | Boyfriend/partner                                                       | 0<br>1                   | No<br>Yes                                                     |
| bq118_3       | Work                                                                    | 0<br>1                   | No<br>Yes                                                     |
| bq118_4       | Other                                                                   | 0<br>1                   | No<br>Yes                                                     |
| bq118_oth     | Please specify who else you get money from                              | User entered text        |                                                               |
| bq120         | If you get money from a man or boyfriend do they request sex in return? | 0<br>1                   | No<br>Yes                                                     |
| q1            | It is hard for me to walk for more than 15 minutes                      | 1<br>2<br>3<br>4<br>5    | Never<br>Almost never<br>Sometimes<br>Almost always<br>Always |
| q2            | It is hard for me to run                                                | 1<br>2<br>3<br>4<br>5    | Never<br>Almost never<br>Sometimes<br>Almost always<br>Always |
| q3            | It is hard for me to do sports activity or exercise                     | 1<br>2<br>3<br>4<br>5    | Never<br>Almost never<br>Sometimes<br>Almost always<br>Always |
| q4            | It is hard for me to lift something heavy                               | 1<br>2<br>3<br>4<br>5    | Never<br>Almost never<br>Sometimes<br>Almost always<br>Always |

**Data Dictionary – Baseline Cups or Cash for Girls Trial sociodemographic and quality of life survey**

| Variable Name | Question Text                                        | Saved Value           |                                                               |
|---------------|------------------------------------------------------|-----------------------|---------------------------------------------------------------|
| ql5           | It is hard for me to take a bath or shower by myself | 1<br>2<br>3<br>4<br>5 | Never<br>Almost never<br>Sometimes<br>Almost always<br>Always |
| ql6           | It is hard for me to do chores around the house      | 1<br>2<br>3<br>4<br>5 | Never<br>Almost never<br>Sometimes<br>Almost always<br>Always |
| ql7           | I hurt or ache                                       | 1<br>2<br>3<br>4<br>5 | Never<br>Almost never<br>Sometimes<br>Almost always<br>Always |
| ql8           | I have low energy                                    | 1<br>2<br>3<br>4<br>5 | Never<br>Almost never<br>Sometimes<br>Almost always<br>Always |
| ql9           | I feel afraid or scared                              | 1<br>2<br>3<br>4<br>5 | Never<br>Almost never<br>Sometimes<br>Almost always<br>Always |
| ql10          | I feel sad or blue                                   | 1<br>2<br>3<br>4<br>5 | Never<br>Almost never<br>Sometimes<br>Almost always<br>Always |
| ql11          | I feel angry                                         | 1<br>2<br>3<br>4<br>5 | Never<br>Almost never<br>Sometimes<br>Almost always<br>Always |
| ql12          | I have trouble sleeping                              | 1<br>2<br>3<br>4<br>5 | Never<br>Almost never<br>Sometimes<br>Almost always<br>Always |
| ql13          | I worry about what will happen to me                 | 1<br>2<br>3           | Never<br>Almost never<br>Sometimes                            |

**Data Dictionary – Baseline Cups or Cash for Girls Trial sociodemographic and quality of life survey**

| Variable Name | Question Text                                     | Saved Value |               |
|---------------|---------------------------------------------------|-------------|---------------|
|               |                                                   | 4           | Almost always |
|               |                                                   | 5           | Always        |
| ql14          | I have trouble getting along with other teens     | 1           | Never         |
|               |                                                   | 2           | Almost never  |
|               |                                                   | 3           | Sometimes     |
|               |                                                   | 4           | Almost always |
|               |                                                   | 5           | Always        |
| ql15          | Other teens do not want to be my friend           | 1           | Never         |
|               |                                                   | 2           | Almost never  |
|               |                                                   | 3           | Sometimes     |
|               |                                                   | 4           | Almost always |
|               |                                                   | 5           | Always        |
| ql16          | Other teens tease me                              | 1           | Never         |
|               |                                                   | 2           | Almost never  |
|               |                                                   | 3           | Sometimes     |
|               |                                                   | 4           | Almost always |
|               |                                                   | 5           | Always        |
| ql17          | I cannot do things that other teens my age can do | 1           | Never         |
|               |                                                   | 2           | Almost never  |
|               |                                                   | 3           | Sometimes     |
|               |                                                   | 4           | Almost always |
|               |                                                   | 5           | Always        |
| ql18          | It is hard to keep up with my peers               | 1           | Never         |
|               |                                                   | 2           | Almost never  |
|               |                                                   | 3           | Sometimes     |
|               |                                                   | 4           | Almost always |
|               |                                                   | 5           | Always        |
| ql19          | It is hard to pay attention in class              | 1           | Never         |
|               |                                                   | 2           | Almost never  |
|               |                                                   | 3           | Sometimes     |
|               |                                                   | 4           | Almost always |
|               |                                                   | 5           | Always        |
| ql20          | I forget things                                   | 1           | Never         |
|               |                                                   | 2           | Almost never  |
|               |                                                   | 3           | Sometimes     |
|               |                                                   | 4           | Almost always |
|               |                                                   | 5           | Always        |
| ql21          | I have trouble keeping up with my school work     | 1           | Never         |
|               |                                                   | 2           | Almost never  |

**Data Dictionary – Baseline Cups or Cash for Girls Trial sociodemographic and quality of life survey**

| Variable Name | Question Text                                 | Saved Value |               |
|---------------|-----------------------------------------------|-------------|---------------|
|               |                                               | 3           | Sometimes     |
|               |                                               | 4           | Almost always |
|               |                                               | 5           | Always        |
| q122          | I miss school because of not feeling well     | 1           | Never         |
|               |                                               | 2           | Almost never  |
|               |                                               | 3           | Sometimes     |
|               |                                               | 4           | Almost always |
|               |                                               | 5           | Always        |
| q123          | I miss school to go to the doctor or hospital | 1           | Never         |
|               |                                               | 2           | Almost never  |
|               |                                               | 3           | Sometimes     |
|               |                                               | 4           | Almost always |
|               |                                               | 5           | Always        |
